# Supplementary material
Source: Elsevier journal article supplement (https://www.sciencedirect.com/science/article/pii/S2173579420300773)
Supplement: mmc2 [file S2173579420300773:mmc2.pdf]

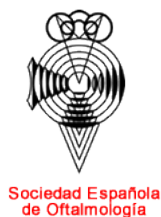

## Apéndice B:

### Consentimiento Informado

### Consejo Médico Oftalmológico Tele-asistido

**Ley 41/2002, de 14 de noviembre, básica reguladora de la autonomía del paciente y de derechos y obligaciones en materia de información y documentación clínica.**

Este Documento cumple con los requisitos relativos al Código de Deontología Médica vigente, así como el de la edición provisional del nuevo CDM del 2018, el Código de Ética de la Sociedad Española de Oftalmología, así como en lo relativo a la Ley Orgánica 3/2018, de 5 de diciembre, de Protección de Datos Personales y garantía de derechos digitales y Ley 41/2002, de 14 de noviembre, básica reguladora de la autonomía del paciente y de derechos y obligaciones en materia de información y documentación clínica.

**¿Qué es el Consejo Médico Tele-asistido? (CoMeTa):** Se entiende por **CoMeTa** a la comunicación por medio de una llamada telefónica, videollamada o envío-recepción de mensajes (correo electrónico y sistemas de mensajería instantánea), entre un médico y un paciente a fin de proporcionar atención médica. Dicha asistencia **no es presencial**, sino que se efectúa a distancia por medio de dispositivos electrónicos como teléfonos, tabletas o computadoras.

**Justificación y limitaciones del Consejo Médico Tele-asistido:** Por sus características particulares, el **CoMeTa** no puede sustituir a una consulta médica presencial. Su justificación viene dada por las limitaciones impuestas por el Decreto de Estado de Alarma y confinamiento de la población, como consecuencia de la pandemia COVID-19, y por ello permanecerá vigente únicamente durante esta etapa y el posterior periodo de recuperación y acercamiento social progresivo, mientras las autoridades sanitarias así lo impongan o aconsejen. En todo caso, y dado que la **salud es un derecho fundamental**, cuando el estado evolutivo de la enfermedad del paciente, a criterio del médico así lo requiera, se indicarán todas las consultas presenciales que sean necesarias.

**Peculiaridades específicas del Consejo Oftalmológico Tele-asistido:** Con relación a las consultas oftalmológicas, el médico oftalmólogo no podrá disponer de las imágenes del segmento anterior del ojo que le proporciona un instrumento denominado lámpara de hendidura, ni tampoco del fondo de ojo para ver la retina y el nervio óptico mediante diferentes aparatos conocidos como oftalmoscopios. Tampoco podrá tomar la presión intraocular. Las únicas imágenes que el médico puede disponer y analizar durante esta situación son aquellas obtenidas a partir de fotografías de la parte anterior del ojo que

el paciente pueda remitirle de sí mismo. Dichas imágenes pueden subordinarse a importantes limitaciones de distinta índole: limitaciones identitarias (demostración de la autenticidad del paciente), limitaciones de temporalidad (demostración del momento presente del cuadro clínico) y limitaciones técnicas (adecuación del tamaño, resolución, enfoque, iluminación central y de campo, filtros de luz, ausencia de hendidura óptica, etc). Todas estas circunstancias expuestas anteriormente, van a limitar considerablemente la capacidad diagnóstica del médico oftalmólogo y, en consecuencia, la eficacia y oportunidad tanto del tratamiento prescrito como del pronóstico, de forma que puedan inducir a errores involuntarios.

**Consentimiento (autorización del paciente o responsable legal para efectuar el Consejo Médico-oftalmológico Tele-asistido):**

D./D<sup>a</sup> \_\_\_\_\_, con DNI nº: \_\_\_\_\_,  
pongo de manifiesto lo siguiente:

Que he recibido este documento de consentimiento informado por escrito tras mi solicitud de **Consejo Médico-oftalmológico Tele-asistido** con tiempo suficiente para su lectura detallada y reflexión, y habiendo sido aclaradas de forma satisfactoria todas mis dudas relativas al mismo, mi firma al pie de este documento certifica que **doy voluntariamente mi consentimiento** para que se me proporcione dicho Consejo Médico - oftalmológico Tele-asistido por el Dr./Dra. \_\_\_\_\_; nº colegiado \_\_\_\_\_

Que **explicaré con la máxima claridad y precisión** los síntomas y molestias que presento sin ocultar detalle alguno, por insignificante que pueda parecerme.

Que cumpliré con la recomendación de **acudir a la consulta presencial** cuando mis necesidades de salud lo requieran y el médico así lo disponga y me lo indique.

Me han explicado y he entendido que durante el Consejo Tele-asistido no es posible realizar ninguna exploración médico-oftalmológica, y que el especialista solo se puede guiar por mis declaraciones y/o las imágenes que yo le remita (caso de video-asistencia o envío de fotografías del ojo), para intentar alcanzar un diagnóstico de presunción y no forzosamente de certeza, por lo que **reconozco las limitaciones de este procedimiento y las acepto con rotundidad de pleno acuerdo.**

Aunque se tomarán las medidas necesarias para salvaguardar la confidencialidad, secreto y privacidad, comprendo y reconozco que no es posible garantizar la absoluta **seguridad en la comunicación y transferencia de datos electrónicos** para preservar dichos fines.

**Riesgos particulares:** \_\_\_\_\_

Aporto los siguientes documentos y exploraciones: \_\_\_\_\_

**SI / NO** autorizo al equipo médico para obtener fotografías, vídeos o registros gráficos de datos o audio con fines científicos o docentes, preservando siempre mi identidad.

Firma del paciente:

Firma del médico:

Fecha:

**TUTOR LEGAL O FAMILIAR:** Debido a que el paciente ha sido considerado no capacitado para aceptar o rechazar el Consejo Médico-oftalmológico Tele-asistido, por todo ello YO: D/D<sup>a</sup> \_\_\_\_\_ DNI \_\_\_\_\_ Como \_\_\_\_\_ doy mi consentimiento para que dicha consulta tele-asistida sea realizada, asumiendo los riesgos y complicaciones que puedan derivarse de la misma. Puedo retirar este consentimiento cuando por el bien del paciente lo estime oportuno.

Firma del tutor o familiar:

Fecha:
